# Supplementary material for: Tissue-specific pathways and networks underlying sexual dimorphism in non-alcoholic fatty liver disease
Source: PubMed Central journal article supplement (PMC6196429; doi:10.1186/s13293-018-0205-7), 2018-10-22
Supplement: 13293_2018_205_MOESM1_ESM.pdf [file 13293_2018_205_MOESM1_ESM.pdf]

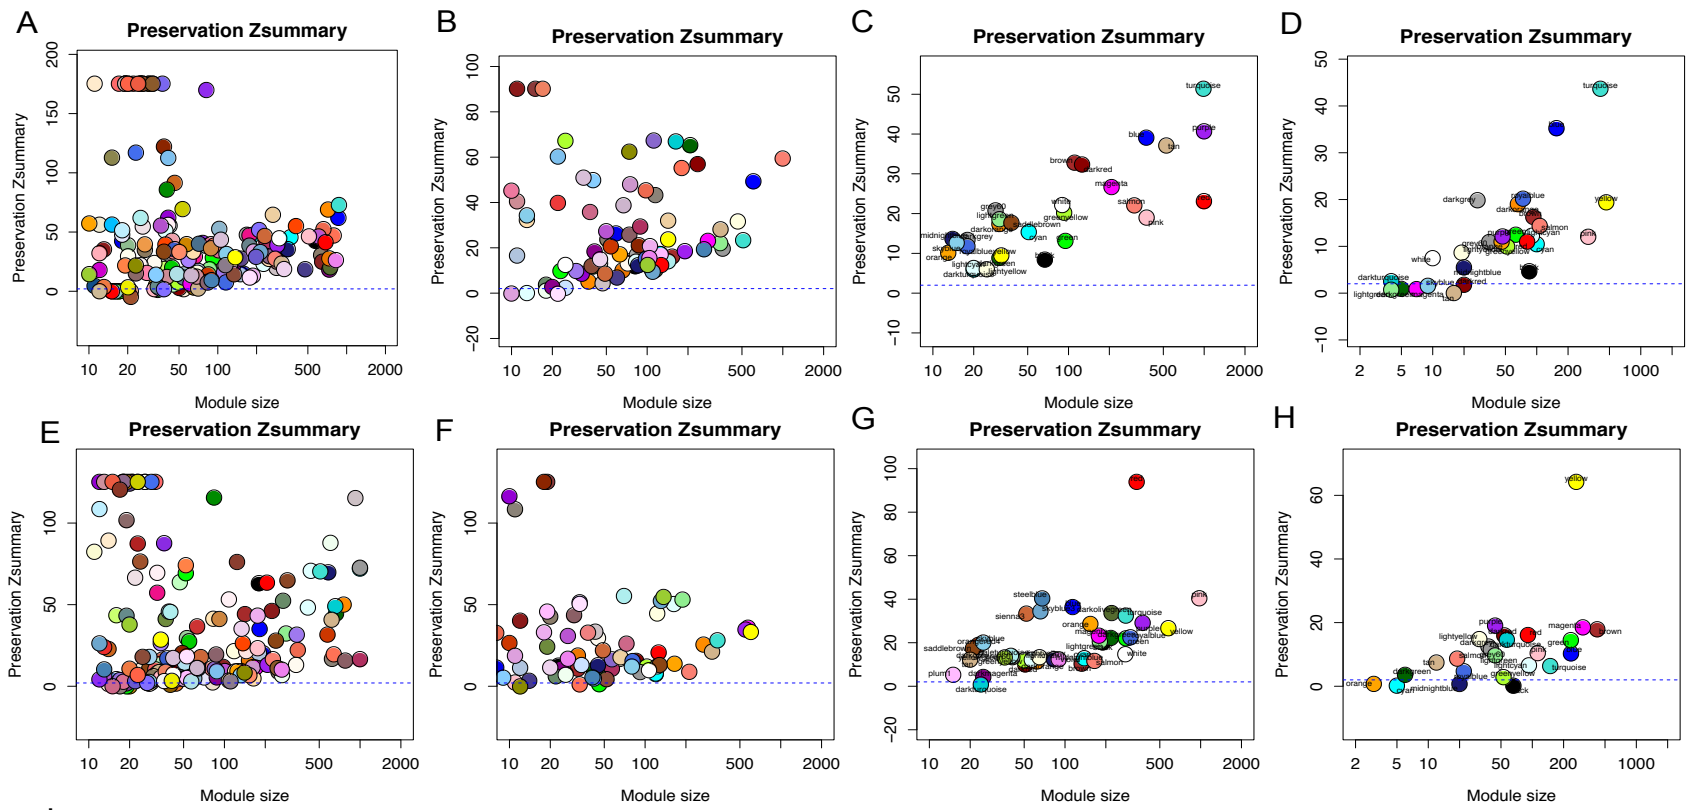

| Tissue  | Network type     | Female modules preservation in male expression data              | Male modules preservation in Female expression data            |                                                                            |
|---------|------------------|------------------------------------------------------------------|----------------------------------------------------------------|----------------------------------------------------------------------------|
| Liver   | WGCNA            | 0 modules non-conserved (0%)<br>30 modules conserved (100%)      | 1 module non-conserved (3%)<br>40 modules conserved (97%)      | Avg. in liver across sexes:<br>5% non-conserved<br>95% conserved           |
|         | MEGENA           | 15 modules non-conserved (7%)<br>198 modules conserved (93%)     | 12 modules non-conserved (6%)<br>192 modules conserved (94%)   |                                                                            |
|         | Avg. in each sex | Average in female liver:<br>4% non-conserved<br>96% conserved    | Average in male liver:<br>5% non-conserved<br>95% conserved    |                                                                            |
| Adipose | WGCNA            | 6 modules non-conserved (20%)<br>24 modules conserved (80%)      | 4 modules non-conserved (15%)<br>26 modules conserved (85%)    | Avg. in adipose tissue across sexes:<br>12% non-conserved<br>88% conserved |
|         | MEGENA           | 4 modules non-conserved (5%)<br>81 modules conserved (95%)       | 3 modules non-conserved (4%)<br>79 modules conserved (96%)     |                                                                            |
|         | Avg. in each sex | Average in female adipose:<br>13% non-conserved<br>87% conserved | Average in male adipose:<br>10% non-conserved<br>90% conserved |                                                                            |

**Additional File 1: Z-summary scores for the module preservation of the female and male coexpression modules for both MEGENA and WGCNA methods in each tissue.** Preservation of the female MEGENA modules in male MEGENA modules for (A) Liver and (B) Adipose tissues. Preservation of female WGCNA modules in male WGCNA modules for (C) Liver and (D) Adipose tissues. Preservation of the male MEGENA modules in female MEGENA modules for (E) Liver and (F) Adipose tissues. Preservation of male WGCNA modules in female WGCNA modules for (G) Liver and (H) Adipose tissues. A Z-summary score <2 (dashed blue line) shows no preservation, whereas a Z-summary score >2 shows evidence for the preservation. (I) Mutual preservation ratios of female and male coexpression modules for both methods and both tissues.
