# Supplementary material for: Tissue-specific pathways and networks underlying sexual dimorphism in non-alcoholic fatty liver disease
Source: PubMed Central journal article supplement (PMC6196429; doi:10.1186/s13293-018-0205-7), 2018-10-22
Supplement: 13293_2018_205_MOESM7_ESM.pdf [file 13293_2018_205_MOESM7_ESM.pdf]

Key Driver genes  
 Network genes  
 Human NAFLD GWAS genes  
 Non-member network genes

**A**

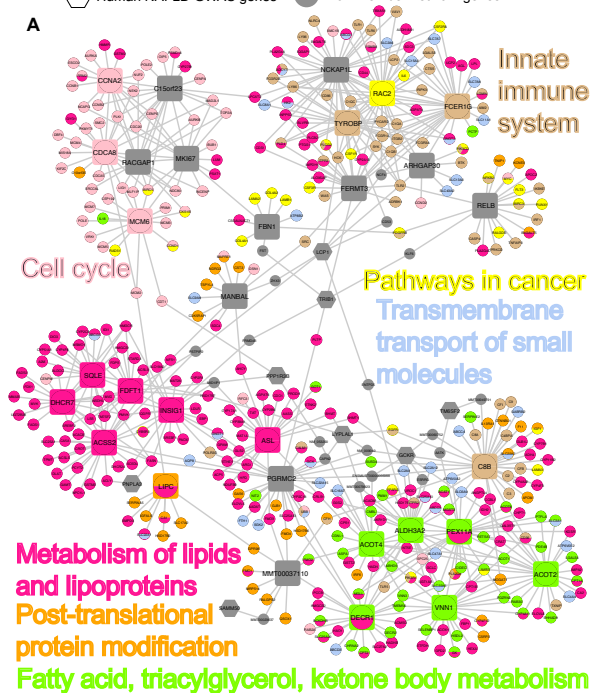

**B**

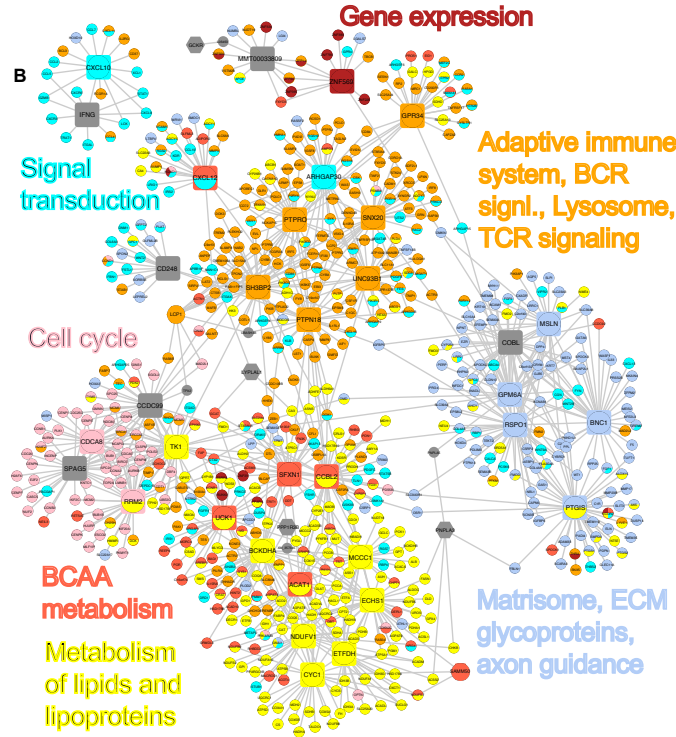

**Additional File 7. Combined subnetworks of NAFLD processes that are shared between sexes or female-specific. (A)** Liver Bayesian subnetwork comprised of NAFLD supersets that are perturbed in liver tissue of females (as a combination of female-specific processes or shared processes between sexes) and the top key drivers of each superset. **(B)** Adipose Bayesian subnetwork comprised of NAFLD supersets that are perturbed in adipose tissue of females (as a combination of female-specific processes or shared processes between sexes) and the top key drivers of each superset.
