# Supplementary material for: Tissue-specific pathways and networks underlying sexual dimorphism in non-alcoholic fatty liver disease
Source: Biol Sex Differ. 2018 Oct 22;9:46. doi: 10.1186/s13293-018-0205-7 (PMC6196429; doi:10.1186/s13293-018-0205-7)
Supplement: Supplementary file 2 — GO annotation of the hepatic triglyceride-related modules (based on eigen gene and trait correlation) (XLSX 32 kb) [file 13293_2018_205_MOESM2_ESM.xlsx]

## Sheet: Additional File 2
Additional File 2. GO annotation of the hepatic TG-related modules (based on eigen gene and trait correlation)
Module	ModuleSize	System	Gene.Category	OverlapGeneCount	PopulationOverlap	GeneSetCount	Population	pvalue_corrected	Fisher_pvalue	Gene.Symbol.of.Overlaps
MEGENA_36_adipose_female	1338	REACTOME	REACTOME_immune_system	148	779	933	9217	4.1e-12	3.1e-15	ITGB2;CTSS;EVL;NCF2;CYBA;TYROBP;BLNK;CD200R1;WAS;FYB;PTPN6;CD44;C1QB;BTK;IL7R;LY86;IRF5;SYK;C1QC;HCK;CYBB;IRF8;HLA-DRB1;NCF4;RAP1B;CSF2RA;LCP2;IL1RN;HLA-DMA;PLCG2;LGALS3;PTPRC;CD74;NRAS;PRKCB;CAPZA2;LGMN;CTSK;PRKCD;SKP2;FCGR1A;CTSB;PTPN1;OSBPL1A;FOS;TLR7;CD86;TEC;PYCARD;MRC1;VAV1;KPNA3;SEC61A2;LYN;CCR2;TLR8;RBCK1;TLR2;AP2M1;PAK1;NFKBIE;CD14;IL2RG;WWP1;PSTPIP1;IKBKE;IL3RA;GRB2;CTSA;EGR1;RIPK3;IL1R…
MEGENA_36_adipose_female	1338	KEGG	KEGG_lysosome	37	779	121	9217	2.1e-09	1.6e-12	CTSS;LAPTM5;CD68;SLC11A1;TCIRG1;GLA;LGMN;CTSK;MAN2B1;HEXA;CTSB;GALNS;NAGLU;MANBA;PLA2G15;CTSA;GUSB;CTSE;AP3M1;AP1B1;HYAL1;SUMF1;HEXB;SMPD1;PSAP;TPP1;CTSZ;ACP2;CTSL1;CLTA;CTSC;GM2A;IGF2R;ASAH1;FUCA1;NEU1;AP4B1
MEGENA_36_adipose_female	1338	PID	PID_pdgfrbpathway	37	779	129	9217	1.8e-08	1.4e-11	HCK;RAP1B;SLA;ACTR3;DOK1;ARPC1B;NRAS;ARPC4;YWHAH;PRKCD;PTPRJ;ARPC5;PTPN1;FOS;IQGAP1;LYN;EPS8;PIK3CG;PAK1;GRB2;ABI1;RASA1;ARHGDIA;CYFIP2;PDGFB;PIK3CD;PDGFRB;ACTR2;ARPC2;CSK;FGR;KRAS;MAP2K4;JAK2;CBL;MAPK8;MAP2K7
MEGENA_36_adipose_female	1338	KEGG	KEGG_b_cell_receptor_signaling_pathway	27	779	75	9217	3.3e-08	2.5e-11	BLNK;PTPN6;BTK;SYK;VAV3;RAC2;PLCG2;NRAS;PRKCB;CD72;FOS;VAV1;LYN;DAPP1;PIK3CG;NFKBIE;CD22;PPP3R1;GRB2;INPP5D;AKT3;PIK3CD;PIK3AP1;BCL10;KRAS;FCGR2B;NFKB1
MEGENA_36_adipose_female	1338	PID	PID_tcr_pathway	25	779	66	9217	5e-08	3.8e-11	WAS;FYB;PTPN6;HLA-DRB1;LCP2;RASSF5;PTPRC;MAP4K1;NRAS;PRKCB;SH3BP2;CD86;VAV1;GRB2;INPP5D;CD80;STK39;BCL10;CSK;MAP3K8;PDPK1;KRAS;ORAI1;CBL;DBNL
MEGENA_14_adipose_female	772	PID	PID_myc_represspathway	11	427	63	9217	0.17	0.00013	CDKN1A;NDRG1;ITGA6;CDKN1B;SP1;CDKN2B;ZBTB17;GTF2H2;SMAD4;NFYB;CFLAR
MEGENA_14_adipose_female	772	BIOCARTA	BIOCARTA_g1_pathway	7	427	28	9217	0.29	0.00022	CDKN1A;CDKN1B;ATR;CDKN2B;CDC25A;ATM;SMAD4
MEGENA_14_adipose_female	772	KEGG	KEGG_p53_signaling_pathway	11	427	69	9217	0.4	0.0003	CDKN1A;SERPINE1;GTSE1;SESN2;FAS;ZMAT3;CCNG1;ATR;SERPINB5;ATM;CCND2
MEGENA_14_adipose_female	772	KEGG	KEGG_focal_adhesion	21	427	201	9217	0.53	0.0004	COL6A2;COL4A2;COL4A1;COL5A1;COL6A1;ITGB5;THBS2;COL5A3;ITGA6;VEGFC;VCL;BAD;MYLK;ACTN4;PIK3R2;HGF;PARVA;MYL12A;FIGF;BCAR1;CCND2
MEGENA_14_adipose_female	772	BIOCARTA	BIOCARTA_cellcycle_pathway	6	427	23	9217	0.65	0.00049	CDKN1A;CDK7;CDKN1B;CDKN2B;CDC25A;CCND2
MEGENA_6_adipose_female	603	NABA	NABA_core_matrisome	38	355	275	9217	5.9e-09	4.5e-12	RSPO1;LTBP1;AEBP1;OGN;IGFBP6;THBS3;FBLN1;LTBP4;SPON2;SMOC1;LTBP2;COL4A5;LAMA4;SLIT2;VIT;OMD;PRG4;OPTC;SLIT3;ELN;LAMB3;IGFBP3;SPOCK3;VWA1;RELN;WISP1;LAMB1;EFEMP1;FNDC1;LGI4;GAS6;FMOD;IGFBP5;DPT;COL4A6;NTN1;NPNT;SPOCK2
MEGENA_6_adipose_female	603	NABA	NABA_ecm_glycoproteins	29	355	196	9217	4.5e-07	3.4e-10	RSPO1;LTBP1;AEBP1;IGFBP6;THBS3;FBLN1;LTBP4;SPON2;SMOC1;LTBP2;LAMA4;SLIT2;VIT;SLIT3;ELN;LAMB3;IGFBP3;VWA1;RELN;WISP1;LAMB1;EFEMP1;FNDC1;LGI4;GAS6;IGFBP5;DPT;NTN1;NPNT
MEGENA_6_adipose_female	603	REACTOME	REACTOME_axon_guidance	29	355	251	9217	0.00014	1e-07	MYH11;NEO1;NCAM1;EZR;COL4A5;MYL9;SLIT2;SEMA5A;CNTN1;CAP2;SLIT3;CACNB3;TRPC3;SCN3B;DLG3;SEMA3A;ERBB2;LAMB1;TRPC6;CACNA1G;ITGA9;ITGA2B;GFRA4;NTN1;ABL1;ST8SIA2;CACNB1;DLG1;ENAH
MEGENA_80_adipose_female	572	KEGG	KEGG_valine_leucine_and_isoleucine_degradation	8	308	44	9217	0.12	8.8e-05	ACAT1;ACAD8;HIBCH;DBT;IVD;ALDH3A2;ALDH9A1;HMGCL
MEGENA_80_adipose_female	572	REACTOME	REACTOME_branched_chain_amino_acid_catabolism	5	308	17	9217	0.24	0.00018	ACAT1;ACAD8;HIBCH;DBT;IVD
MEGENA_80_adipose_female	572	REACTOME	REACTOME_metabolism_of_nucleotides	9	308	72	9217	0.82	0.00062	UCK1;DHODH;GART;DGUOK;ADSL;GDA;AMPD3;GUK1;GMPR
MEGENA_80_adipose_female	572	REACTOME	REACTOME_purine_metabolism	6	308	33	9217	0.91	0.00068	GART;DGUOK;ADSL;GDA;AMPD3;GMPR
MEGENA_80_adipose_female	572	REACTOME	REACTOME_late_phase_of_hiv_life_cycle	11	308	104	9217	0.9	0.00068	NUP210;NUP107;GTF2H3;CCNT1;TBP;RNGTT;TAF6;POLR2D;NUPL2;NUP133;VPS37B
MEGENA_75_adipose_female	431	REACTOME	REACTOME_tca_cycle_and_respiratory_electron_transport	28	235	141	9217	0	0	UQCRC2;NDUFV1;ACO2;IDH3B;IDH3G;NDUFA10;SDHA;PDHA1;UQCR11;SDHB;NDUFB8;UQCRQ;DLD;OGDH;NDUFC1;NDUFB5;NDUFB6;L2HGDH;NDUFAB1;ATP5A1;NDUFS3;ATP5B;IDH2;FH;NDUFS2;ATP5F1;ETFB;SUCLG1
MEGENA_75_adipose_female	431	KEGG	KEGG_citrate_cycle_tca_cycle	12	235	32	9217	1.1e-08	8.2e-12	ACO2;IDH3B;IDH3G;SDHA;PDHA1;SDHB;DLD;OGDH;PC;IDH2;FH;SUCLG1
MEGENA_75_adipose_female	431	REACTOME	REACTOME_respiratory_electron_transport_atp_synthesis_by_chemiosmotic_coupling_and_heat_production_by_uncoupling_proteins_	18	235	98	9217	4.8e-08	3.6e-11	UQCRC2;NDUFV1;NDUFA10;SDHA;UQCR11;SDHB;NDUFB8;UQCRQ;NDUFC1;NDUFB5;NDUFB6;NDUFAB1;ATP5A1;NDUFS3;ATP5B;NDUFS2;ATP5F1;ETFB
MEGENA_75_adipose_female	431	REACTOME	REACTOME_citric_acid_cycle_tca_cycle	10	235	26	9217	4.7e-07	3.6e-10	ACO2;IDH3B;IDH3G;SDHA;SDHB;DLD;OGDH;IDH2;FH;SUCLG1
MEGENA_75_adipose_female	431	REACTOME	REACTOME_mitochondrial_fatty_acid_beta_oxidation	8	235	14	9217	5.6e-07	4.2e-10	ECHS1;PCCB;PCCA;MUT;ECI1;ACADL;MCEE;HADH
MEGENA_42_adipose_female	420	REACTOME	REACTOME_semaphorin_interactions	9	232	68	9217	0.063	4.7e-05	LIMK2;RHOC;MET;SEMA4A;PAK2;TLN1;PLXNA2;RHOB;MYH14
MEGENA_42_adipose_female	420	REACTOME	REACTOME_pi3k_cascade	9	232	71	9217	0.088	6.6e-05	IRS1;FGFR2;AKT2;PIK3C3;FGF2;INSR;EIF4EBP1;STRADA;FGFR3
MEGENA_42_adipose_female	420	KEGG	KEGG_pathways_in_cancer	21	232	328	9217	0.1	7.8e-05	EGLN3;VEGFB;TRAF3;FGFR2;NFKB2;MDM2;VHL;MET;VEGFA;AXIN2;AKT2;IKBKG;ZBTB16;E2F1;FGF2;BAX;CCDC6;GSK3B;LAMC1;FZD5;FGFR3
MEGENA_42_adipose_female	420	REACTOME	REACTOME_insulin_receptor_signalling_cascade	9	232	87	9217	0.43	0.00032	IRS1;FGFR2;AKT2;PIK3C3;FGF2;INSR;EIF4EBP1;STRADA;FGFR3
MEGENA_42_adipose_female	420	REACTOME	REACTOME_sema4d_in_semaphorin_signaling	5	232	32	9217	1	0.0011	LIMK2;RHOC;MET;RHOB;MYH14
MEGENA_110_adipose_female	405	REACTOME	REACTOME_semaphorin_interactions	9	227	68	9217	0.053	4e-05	LIMK2;RHOC;MET;SEMA4A;PAK2;TLN1;PLXNA2;RHOB;MYH14
MEGENA_110_adipose_female	405	REACTOME	REACTOME_pi3k_cascade	9	227	71	9217	0.075	5.6e-05	IRS1;FGFR2;AKT2;PIK3C3;FGF2;INSR;EIF4EBP1;STRADA;FGFR3
MEGENA_110_adipose_female	405	KEGG	KEGG_pathways_in_cancer	21	227	328	9217	0.075	5.7e-05	EGLN3;VEGFB;TRAF3;FGFR2;NFKB2;MDM2;VHL;MET;VEGFA;AXIN2;AKT2;IKBKG;ZBTB16;E2F1;FGF2;BAX;CCDC6;GSK3B;LAMC1;FZD5;FGFR3
MEGENA_110_adipose_female	405	REACTOME	REACTOME_insulin_receptor_signalling_cascade	9	227	87	9217	0.37	0.00028	IRS1;FGFR2;AKT2;PIK3C3;FGF2;INSR;EIF4EBP1;STRADA;FGFR3
MEGENA_110_adipose_female	405	REACTOME	REACTOME_sema4d_in_semaphorin_signaling	5	227	32	9217	1	0.001	LIMK2;RHOC;MET;RHOB;MYH14
MEGENA_59_adipose_female	371	KEGG	KEGG_cell_cycle	10	193	128	9217	0.45	0.00034	CDK7;CDKN1B;ORC2;ATR;CDKN2B;ZBTB17;ORC5;ATM;ANAPC7;CCND2
MEGENA_59_adipose_female	371	BIOCARTA	BIOCARTA_cellcycle_pathway	4	193	23	9217	1	0.0012	CDK7;CDKN1B;CDKN2B;CCND2
MEGENA_59_adipose_female	371	REACTOME	REACTOME_ppara_activates_gene_expression	8	193	104	9217	1	0.0015	FADS1;MED12;ALAS1;NRF1;CLOCK;MED21;MED9;TEAD1
MEGENA_59_adipose_female	371	BIOCARTA	BIOCARTA_g1_pathway	4	193	28	9217	1	0.0026	CDKN1B;ATR;CDKN2B;ATM
MEGENA_59_adipose_female	371	KEGG	KEGG_glycine_serine_and_threonine_metabolism	4	193	31	9217	1	0.0038	GAMT;CTH;PSAT1;ALAS1
MEGENA_116_adipose_female	249	KEGG	KEGG_cell_cycle	8	133	128	9217	0.68	0.00051	CDK7;CDKN1B;ORC2;ATR;CDKN2B;ZBTB17;ORC5;ANAPC7
MEGENA_116_adipose_female	249	PID	PID_myc_represspathway	5	133	63	9217	1	0.0021	ITGA6;CDKN1B;SP1;CDKN2B;ZBTB17
MEGENA_116_adipose_female	249	KEGG	KEGG_porphyrin_and_chlorophyll_metabolism	4	133	41	9217	1	0.0028	CP;PPOX;ALAS1;EPRS
MEGENA_57_adipose_female	185	REACTOME	REACTOME_collagen_formation	8	113	58	9217	0.00061	4.6e-07	COL6A2;COL4A2;COL4A1;COL5A1;PCOLCE2;COL6A1;COL5A3;COL12A1
MEGENA_57_adipose_female	185	NABA	NABA_collagens	7	113	44	9217	0.0012	9.1e-07	COL6A2;COL4A2;COL4A1;COL5A1;COL6A1;COL5A3;COL12A1
MEGENA_57_adipose_female	185	KEGG	KEGG_ecm_receptor_interaction	8	113	84	9217	0.011	8e-06	COL6A2;COL4A2;COL4A1;COL5A1;COL6A1;ITGB5;COL5A3;SDC2
MEGENA_57_adipose_female	185	REACTOME	REACTOME_extracellular_matrix_organization	8	113	87	9217	0.014	1e-05	COL6A2;COL4A2;COL4A1;COL5A1;PCOLCE2;COL6A1;COL5A3;COL12A1
MEGENA_57_adipose_female	185	BIOCARTA	BIOCARTA_plateletapp_pathway	4	113	14	9217	0.026	2e-05	COL4A2;COL4A1;APP;SERPINE1
MEGENA_83_adipose_female	164	KEGG	KEGG_oxidative_phosphorylation	7	72	135	9217	0.11	8.2e-05	NDUFV2;NDUFS8;NDUFB2;NDUFA11;UQCR10;NDUFB7;ATP6V0A2
MEGENA_83_adipose_female	164	REACTOME	REACTOME_respiratory_electron_transport	5	72	79	9217	0.48	0.00036	NDUFV2;NDUFS8;NDUFB2;NDUFA11;NDUFB7
MEGENA_83_adipose_female	164	REACTOME	REACTOME_respiratory_electron_transport_atp_synthesis_by_chemiosmotic_coupling_and_heat_production_by_uncoupling_proteins_	5	72	98	9217	1	0.00098	NDUFV2;NDUFS8;NDUFB2;NDUFA11;NDUFB7
MEGENA_83_adipose_female	164	KEGG	KEGG_parkinsons_disease	5	72	133	9217	1	0.0038	NDUFV2;NDUFS8;NDUFB2;UQCR10;NDUFB7
MEGENA_25_adipose_female	162	NABA	NABA_core_matrisome	10	91	275	9217	0.48	0.00036	RSPO1;LTBP4;SLIT3;LAMB3;SPOCK3;VWA1;LAMB1;FNDC1;FMOD;SPOCK2
MEGENA_25_adipose_female	162	NABA	NABA_ecm_glycoproteins	7	91	196	9217	1	0.0032	RSPO1;LTBP4;SLIT3;LAMB3;VWA1;LAMB1;FNDC1
MEGENA_76_adipose_female	140	REACTOME	REACTOME_tca_cycle_and_respiratory_electron_transport	15	86	141	9217	3.2e-09	2.4e-12	NDUFS1;CYC1;UCP1;DLST;UQCRC1;UQCRFS1;ETFDH;SDHC;UCP3;IDH3A;PDK3;PDK4;SDHD;COX5A;SUCLA2
MEGENA_76_adipose_female	140	REACTOME	REACTOME_respiratory_electron_transport_atp_synthesis_by_chemiosmotic_coupling_and_heat_production_by_uncoupling_proteins_	10	86	98	9217	2.8e-05	2.1e-08	NDUFS1;CYC1;UCP1;UQCRC1;UQCRFS1;ETFDH;SDHC;UCP3;SDHD;COX5A
MEGENA_76_adipose_female	140	KEGG	KEGG_oxidative_phosphorylation	11	86	135	9217	5.6e-05	4.2e-08	NDUFS1;CYC1;UQCRC1;UQCRFS1;COX7A1;SDHC;PPA1;SDHD;COX5A;ATP12A;LHPP
MEGENA_76_adipose_female	140	REACTOME	REACTOME_mitochondrial_fatty_acid_beta_oxidation	5	86	14	9217	0.00016	1.2e-07	ACADVL;HADHA;ACADS;HADHB;DECR1
MEGENA_76_adipose_female	140	REACTOME	REACTOME_pyruvate_metabolism_and_citric_acid_tca_cycle	7	86	48	9217	0.00035	2.6e-07	DLST;SDHC;IDH3A;PDK3;PDK4;SDHD;SUCLA2
MEGENA_44_adipose_female	137	REACTOME	REACTOME_cytosolic_trna_aminoacylation	4	68	24	9217	0.034	2.6e-05	EEF1E1;IARS;CARS;NARS
MEGENA_44_adipose_female	137	REACTOME	REACTOME_trna_aminoacylation	4	68	42	9217	0.33	0.00025	EEF1E1;IARS;CARS;NARS
MEGENA_44_adipose_female	137	ST	ST_fas_signaling_pathway	4	68	65	9217	1	0.0013	NFKBIB;EGFR;RIPK1;PFN2
MEGENA_44_adipose_female	137	KEGG	KEGG_rig_i_like_receptor_signaling_pathway	4	68	71	9217	1	0.0018	NFKBIB;RIPK1;MAPK13;OTUD5
MEGENA_60_adipose_female	129	PID	PID_betacatenin_nuc_pathway	4	72	80	9217	1	0.0035	CTNNBIP1;FGF4;APC;TLE1
MEGENA_88_adipose_female	123	REACTOME	REACTOME_dna_repair	5	63	112	9217	1	0.00097	XPC;ERCC5;ERCC8;OGG1;MBD4
MEGENA_88_adipose_female	123	REACTOME	REACTOME_antiviral_mechanism_by_ifn_stimulated_genes	4	63	66	9217	1	0.001	KPNA2;FLNB;EIF4A2;UBE2N
MEGENA_88_adipose_female	123	KEGG	KEGG_ubiquitin_mediated_proteolysis	5	63	138	9217	1	0.0024	UBE2H;PIAS2;ERCC8;SIAH1;UBE2N
MEGENA_107_adipose_female	112	REACTOME	REACTOME_axon_guidance	7	66	251	9217	1	0.002	SEMA5A;SLIT3;SCN3B;SEMA3A;GFRA4;ABL1;ST8SIA2
MEGENA_107_adipose_female	112	KEGG	KEGG_axon_guidance	5	66	129	9217	1	0.0022	SEMA5A;SLIT3;SEMA3A;EPHB6;ABL1
MEGENA_78_adipose_female	109	REACTOME	REACTOME_triglyceride_biosynthesis	5	63	38	9217	0.0071	5.4e-06	ACLY;ELOVL6;FASN;ACACA;GPD1
MEGENA_78_adipose_female	109	REACTOME	REACTOME_fatty_acyl_coa_biosynthesis	4	63	18	9217	0.0075	5.6e-06	ACLY;ELOVL6;FASN;ACACA
MEGENA_78_adipose_female	109	REACTOME	REACTOME_metabolism_of_lipids_and_lipoproteins	12	63	478	9217	0.1	7.8e-05	ACLY;ELOVL6;FASN;ME1;ACACA;GPD1;FAR1;ACOT8;HSD11B1;APOE;PIK3R4;MED30
MEGENA_78_adipose_female	109	REACTOME	REACTOME_glucose_metabolism	5	63	69	9217	0.14	0.0001	GBE1;PYGL;SLC25A10;GPI;ALDOA
MEGENA_78_adipose_female	109	REACTOME	REACTOME_fatty_acid_triacylglycerol_and_ketone_body_metabolism	7	63	168	9217	0.18	0.00014	ACLY;ELOVL6;FASN;ME1;ACACA;GPD1;MED30
MEGENA_28_adipose_female	103	REACTOME	REACTOME_axon_guidance	7	64	251	9217	1	0.0017	NEO1;EZR;COL4A5;SLIT2;CACNB3;DLG3;DLG1
MEGENA_126_adipose_female	99	REACTOME	REACTOME_tca_cycle_and_respiratory_electron_transport	10	66	141	9217	6.9e-05	5.2e-08	CYC1;UCP1;UQCRC1;ETFDH;UCP3;IDH3A;PDK3;PDK4;COX5A;SUCLA2
MEGENA_126_adipose_female	99	REACTOME	REACTOME_mitochondrial_fatty_acid_beta_oxidation	4	66	14	9217	0.003	2.3e-06	ACADVL;HADHA;HADHB;DECR1
MEGENA_126_adipose_female	99	REACTOME	REACTOME_fatty_acid_triacylglycerol_and_ketone_body_metabolism	9	66	168	9217	0.0036	2.7e-06	ACADVL;HADHA;PPARGC1A;PPARA;CPT2;SLC25A20;ELOVL3;HADHB;DECR1
MEGENA_126_adipose_female	99	REACTOME	REACTOME_synthesis_of_bile_acids_and_bile_salts_via_7alpha_hydroxycholesterol	4	66	15	9217	0.0041	3.1e-06	AMACR;SLC27A2;BAAT;ACOX2
MEGENA_126_adipose_female	99	REACTOME	REACTOME_metabolism_of_lipids_and_lipoproteins	14	66	478	9217	0.0072	5.4e-06	ACADVL;HADHA;PPARGC1A;PPARA;CPT2;SLC25A20;ELOVL3;HADHB;AMACR;SLC27A2;PHOSPHO1;DECR1;BAAT;ACOX2
MEGENA_89_adipose_female	91	KEGG	KEGG_glycolysis_gluconeogenesis	4	55	62	9217	0.65	0.00049	PDHB;HK2;PGAM1;PCK2
MEGENA_37_adipose_female	81	REACTOME	REACTOME_unfolded_protein_response	5	47	80	9217	0.067	5e-05	HYOU1;PDIA6;DNAJB11;DNAJC3;CALR
MEGENA_37_adipose_female	81	REACTOME	REACTOME_activation_of_chaperone_genes_by_xbp1s	4	47	46	9217	0.11	8.3e-05	HYOU1;PDIA6;DNAJB11;DNAJC3
MEGENA_37_adipose_female	81	KEGG	KEGG_gnrh_signaling_pathway	5	47	101	9217	0.2	0.00015	JUN;PLA2G12A;PLD1;ITPR3;CALM2
MEGENA_37_adipose_female	81	KEGG	KEGG_pathogenic_escherichia_coli_infection	4	47	59	9217	0.29	0.00022	TUBB6;TUBB2A;FYN;NCK2
MEGENA_108_adipose_female	74	KEGG	KEGG_gnrh_signaling_pathway	5	41	101	9217	0.1	7.8e-05	JUN;PLA2G12A;PLD1;ITPR3;CALM2
MEGENA_108_adipose_female	74	KEGG	KEGG_pathogenic_escherichia_coli_infection	4	41	59	9217	0.17	0.00013	TUBB6;TUBB2A;FYN;NCK2
MEGENA_108_adipose_female	74	PID	PID_pdgfrbpathway	5	41	129	9217	0.33	0.00025	FYN;ARAP1;JUN;NCK2;JUND
MEGENA_77_adipose_female	69	REACTOME	REACTOME_tca_cycle_and_respiratory_electron_transport	15	86	141	9217	3.2e-09	2.4e-12	NDUFS1;CYC1;UCP1;DLST;UQCRC1;UQCRFS1;ETFDH;SDHC;UCP3;IDH3A;PDK3;PDK4;SDHD;COX5A;SUCLA2
MEGENA_77_adipose_female	69	REACTOME	REACTOME_respiratory_electron_transport_atp_synthesis_by_chemiosmotic_coupling_and_heat_production_by_uncoupling_proteins_	10	86	98	9217	2.8e-05	2.1e-08	NDUFS1;CYC1;UCP1;UQCRC1;UQCRFS1;ETFDH;SDHC;UCP3;SDHD;COX5A
MEGENA_77_adipose_female	69	KEGG	KEGG_oxidative_phosphorylation	11	86	135	9217	5.6e-05	4.2e-08	NDUFS1;CYC1;UQCRC1;UQCRFS1;COX7A1;SDHC;PPA1;SDHD;COX5A;ATP12A;LHPP
MEGENA_77_adipose_female	69	REACTOME	REACTOME_mitochondrial_fatty_acid_beta_oxidation	5	86	14	9217	0.00016	1.2e-07	ACADVL;HADHA;ACADS;HADHB;DECR1
MEGENA_77_adipose_female	69	REACTOME	REACTOME_pyruvate_metabolism_and_citric_acid_tca_cycle	7	86	48	9217	0.00035	2.6e-07	DLST;SDHC;IDH3A;PDK3;PDK4;SDHD;SUCLA2
MEGENA_115_adipose_female	57	REACTOME	REACTOME_signaling_by_tgf_beta_receptor_complex	5	36	63	9217	0.0054	4.1e-06	PMEPA1;SERPINE1;SMAD7;SKIL;WWTR1
MEGENA_115_adipose_female	57	REACTOME	REACTOME_transcriptional_activity_of_smad2_smad3_smad4_heterotrimer	4	36	38	9217	0.018	1.3e-05	SERPINE1;SMAD7;SKIL;WWTR1
MEGENA_49_adipose_female	46	KEGG	KEGG_pathways_in_cancer	4	18	328	9217	1	0.0032	RUNX1T1;CRKL;BIRC2;IGF1R
MEGENA_46_adipose_female	38	REACTOME	REACTOME_signaling_by_insulin_receptor	4	23	108	9217	0.18	0.00013	ATP6V1A;ATP6V1C1;ATP6V0B;CAB39
MEGENA_113_adipose_female	37	KEGG	KEGG_ecm_receptor_interaction	7	25	84	9217	2.3e-06	1.7e-09	COL6A2;COL4A2;COL4A1;COL5A1;COL6A1;ITGB5;SDC2
MEGENA_113_adipose_female	37	REACTOME	REACTOME_collagen_formation	6	25	58	9217	1e-05	7.7e-09	COL6A2;COL4A2;COL4A1;COL5A1;PCOLCE2;COL6A1
MEGENA_113_adipose_female	37	REACTOME	REACTOME_ncam1_interactions	5	25	39	9217	6.9e-05	5.2e-08	COL6A2;COL4A2;COL4A1;COL5A1;COL6A1
MEGENA_113_adipose_female	37	REACTOME	REACTOME_extracellular_matrix_organization	6	25	87	9217	0.00012	9.1e-08	COL6A2;COL4A2;COL4A1;COL5A1;PCOLCE2;COL6A1
MEGENA_113_adipose_female	37	NABA	NABA_collagens	5	25	44	9217	0.00013	9.7e-08	COL6A2;COL4A2;COL4A1;COL5A1;COL6A1
WGCNA_1_adipose_female	3413	KEGG	KEGG_toll_like_receptor_signaling_pathway	46	1888	102	9217	2.1e-05	1.6e-08	SPP1;TLR1;CCL3;IRF5;FOS;TLR7;TLR8;CTSK;CD86;PIK3CG;CD40;LY96;IL1B;IKBKE;TLR2;CD14;CCL4;MAP3K8;IRAK4;IL6;MAPK12;TRAF3;IFNA16;PIK3R1;TLR9;IFNB1;CD80;PIK3CD;MAPK10;IL12B;TLR4;RIPK1;AKT3;IKBKG;TIRAP;AKT2;TBK1;MYD88;IFNAR1;AKT1;MAP2K4;MAPK8;IFNAR2;TOLLIP;CASP8;NFKB1
WGCNA_1_adipose_female	3413	PID	PID_bcr_5pathway	33	1888	65	9217	6.8e-05	5.2e-08	BLNK;CD72;FOS;PTPN6;MAP4K1;SYK;CD22;BTK;DOK1;PLCG2;DAPP1;PIK3AP1;PTPRC;LYN;INPP5D;NFATC1;PPP3CC;PIK3R1;POU2F2;RASA1;VAV2;CSK;NFKBIB;GRB2;PAG1;IKBKG;BCL10;AKT1;ELK1;MAPK8;PPP3CB;NFKB1;CAMK2G
WGCNA_1_adipose_female	3413	KEGG	KEGG_b_cell_receptor_signaling_pathway	36	1888	75	9217	0.00011	8.3e-08	BLNK;CD72;FOS;RAC2;PTPN6;VAV1;SYK;CD22;BTK;PIK3CG;PRKCB;VAV3;PLCG2;DAPP1;PIK3AP1;NFKBIE;LYN;INPP5D;NFATC1;PPP3CC;PIK3R1;VAV2;PIK3CD;NFKBIB;GRB2;NRAS;AKT3;IKBKG;AKT2;BCL10;AKT1;PPP3R1;NFATC4;PPP3CB;KRAS;NFKB1
WGCNA_1_adipose_female	3413	KEGG	KEGG_mapk_signaling_pathway	91	1888	267	9217	0.00014	1e-07	PLA2G5;PLA2G2D;FOS;RAC2;MAP4K1;GADD45B;IL1R2;DUSP2;PRKCB;FGF10;PAK1;DUSP7;IL1B;FGF2;GNA12;BRAF;CACNA1H;CD14;TGFB1;PTPRR;DUSP14;MAP3K8;RPS6KA1;CDC25B;NTRK2;PDGFB;TAOK3;MYC;NFKB2;MAP4K2;MAPK12;CACNA1F;RELB;FGF12;PRKX;DDIT3;STK4;FGF20;PPP3CC;ARRB2;FGFR3;GADD45A;PLA2G2F;TRAF2;HSPA1L;DUSP16;CACNB4;RASA1;PLA2G10;CACNA1D;CACNG8;MRAS;MAPK8IP3;MAP3K5;PLA2G12A;FGF11;MAPK10;MAP3K14;DUSP1;GRB2;MKNK2;NRAS;MAX…
WGCNA_1_adipose_female	3413	KEGG	KEGG_lysosome	50	1888	121	9217	0.00016	1.2e-07	GLA;CTSS;CD68;SLC11A1;CTSK;TCIRG1;GUSB;LAPTM5;ATP6V0A1;GALC;LGMN;GALNS;PLA2G15;CLN3;MANBA;GLB1;SORT1;NPC1;MAN2B1;ATP6V0B;NAGLU;HEXB;HGSNAT;NEU1;GAA;AP1S1;SCARB2;CTSA;CTSB;GGA1;HEXA;CTSZ;MFSD8;CLN5;CTSC;GBA;AP1B1;ACP2;IGF2R;GM2A;PPT1;CTSL1;AP1G1;TPP1;CLTA;AP4B1;CTSD;PSAP;LAPTM4B;ASAH1
WGCNA_2_adipose_female	2412	REACTOME	REACTOME_tca_cycle_and_respiratory_electron_transport	63	1275	141	9217	0	0	UCP1;UCP3;PDK2;PDK1;PDK4;L2HGDH;SUCLG2;PDK3;DLAT;ACO2;PDHA1;IDH3A;OGDH;NDUFA5;ETFDH;DLST;PDHB;DLD;UQCRC1;NDUFV1;NDUFS1;UQCRC2;IDH3G;UQCRQ;CYC1;SDHA;IDH3B;SUCLG1;SLC16A1;NDUFS2;CS;NDUFB8;NDUFS7;UQCRFS1;NDUFA10;NDUFB10;NDUFS8;NDUFB5;NDUFA9;SDHC;SDHB;NDUFA12;NDUFA6;NDUFS3;SUCLA2;FH;UQCR11;NDUFC1;NDUFV2;ATP5D;NDUFB6;SDHD;NDUFB2;NDUFA11;COX5A;CYCS;NDUFB9;NDUFB7;NDUFAB1;ETFB;ATP5A1;ATP5B;ATP5F1
WGCNA_2_adipose_female	2412	KEGG	KEGG_citrate_cycle_tca_cycle	23	1275	32	9217	1.6e-10	1.2e-13	ACLY;SUCLG2;DLAT;ACO2;PDHA1;IDH3A;OGDH;PC;DLST;PDHB;PCK2;DLD;IDH3G;SDHA;IDH3B;SUCLG1;ACO1;CS;SDHC;SDHB;SUCLA2;FH;SDHD
WGCNA_2_adipose_female	2412	REACTOME	REACTOME_respiratory_electron_transport_atp_synthesis_by_chemiosmotic_coupling_and_heat_production_by_uncoupling_proteins_	42	1275	98	9217	2.2e-09	1.6e-12	UCP1;UCP3;NDUFA5;ETFDH;UQCRC1;NDUFV1;NDUFS1;UQCRC2;UQCRQ;CYC1;SDHA;NDUFS2;NDUFB8;NDUFS7;UQCRFS1;NDUFA10;NDUFB10;NDUFS8;NDUFB5;NDUFA9;SDHC;SDHB;NDUFA12;NDUFA6;NDUFS3;UQCR11;NDUFC1;NDUFV2;ATP5D;NDUFB6;SDHD;NDUFB2;NDUFA11;COX5A;CYCS;NDUFB9;NDUFB7;NDUFAB1;ETFB;ATP5A1;ATP5B;ATP5F1
WGCNA_2_adipose_female	2412	KEGG	KEGG_alzheimers_disease	59	1275	169	9217	3.2e-09	2.4e-12	COX7A1;MME;ITPR3;MAPT;GRIN2A;CAPN1;GRIN2D;COX8C;ITPR2;GRIN2B;CALML5;COX4I2;NDUFA5;NCSTN;HSD17B10;UQCRC1;ERN1;NDUFV1;NDUFS1;UQCRC2;UQCRQ;CYC1;SDHA;NDUFS2;NDUFB8;NDUFS7;IDE;UQCRFS1;LRP1;NDUFA10;NDUFB10;GRIN1;NDUFS8;NDUFB5;NDUFA9;SDHC;SDHB;NDUFA6;NDUFS3;UQCR11;NDUFC1;NDUFV2;ATP5D;NDUFB6;SDHD;CDK5;UQCR10;NDUFB2;COX5A;CYCS;NDUFB9;NDUFB7;NDUFAB1;APH1A;TNFRSF1A;EIF2AK3;ATP5A1;ATP5B;ATP5F1
WGCNA_2_adipose_female	2412	REACTOME	REACTOME_respiratory_electron_transport	36	1275	79	9217	9.6e-09	7.2e-12	NDUFA5;ETFDH;UQCRC1;NDUFV1;NDUFS1;UQCRC2;UQCRQ;CYC1;SDHA;NDUFS2;NDUFB8;NDUFS7;UQCRFS1;NDUFA10;NDUFB10;NDUFS8;NDUFB5;NDUFA9;SDHC;SDHB;NDUFA12;NDUFA6;NDUFS3;UQCR11;NDUFC1;NDUFV2;NDUFB6;SDHD;NDUFB2;NDUFA11;COX5A;CYCS;NDUFB9;NDUFB7;NDUFAB1;ETFB
WGCNA_3_adipose_female	1188	BIOCARTA	BIOCARTA_g1_pathway	10	632	28	9217	0.012	9.1e-06	CDKN1A;E2F1;CDK6;CDKN2B;CDKN1B;CDKN2A;SMAD3;ATR;GSK3B;RB1
WGCNA_3_adipose_female	1188	PID	PID_p53regulationpathway	14	632	59	9217	0.043	3.3e-05	DAXX;CHEK2;SETD7;CDKN2A;PPM1D;CCNG1;ATR;HIPK2;RCHY1;PPP2R4;FBXO11;GSK3B;MAPK14;NEDD8
WGCNA_3_adipose_female	1188	REACTOME	REACTOME_ppara_activates_gene_expression	19	632	104	9217	0.094	7.1e-05	SLC27A1;FADS1;TEAD1;MED16;HMGCS1;NRF1;MED12;MED26;G0S2;YAP1;ALAS1;MED6;MED23;MED22;MED21;MED9;MED20;CLOCK;MED30
WGCNA_3_adipose_female	1188	PID	PID_ar_tf_pathway	12	632	53	9217	0.26	0.00019	MAP2K6;NR2C1;SRY;SENP1;TRIM24;CARM1;POU2F1;RCHY1;ZMIZ2;GSK3B;MAPK14;SIRT1
WGCNA_3_adipose_female	1188	PID	PID_p73pathway	15	632	79	9217	0.34	0.00026	CDKN1A;CDK6;MAPK11;FAS;RCHY1;GRAMD4;YAP1;PRKACB;BUB3;SP1;FLOT2;MAPK14;DEDD;RB1;SIRT1
MEGENA_30_liver_female	352	KEGG	KEGG_lysosome	11	182	121	9217	0.034	2.6e-05	HEXA;CTSA;CTSZ;ARSG;CLN5;ABCA2;GAA;ASAH1;GNS;ACP5;CTNS
MEGENA_30_liver_female	352	REACTOME	REACTOME_glycosphingolipid_metabolism	6	182	38	9217	0.12	8.9e-05	HEXA;CTSA;ARSG;GAL3ST1;ARSE;ASAH1
MEGENA_30_liver_female	352	REACTOME	REACTOME_regulation_of_signaling_by_cbl	4	182	18	9217	0.48	0.00036	PIK3R1;BLNK;PIK3R2;CRKL
MEGENA_30_liver_female	352	REACTOME	REACTOME_sphingolipid_metabolism	7	182	69	9217	0.53	0.0004	HEXA;CTSA;PPAP2C;ARSG;GAL3ST1;ARSE;ASAH1
MEGENA_30_liver_female	352	REACTOME	REACTOME_downstream_signal_transduction	8	182	95	9217	0.74	0.00056	ADCY6;PDGFA;GRB7;PIK3R1;STAT3;PRKCE;PIK3R2;CRKL
MEGENA_96_liver_female	336	KEGG	KEGG_lysosome	11	172	121	9217	0.02	1.5e-05	HEXA;CTSA;CTSZ;ARSG;CLN5;ABCA2;GAA;ASAH1;GNS;ACP5;CTNS
MEGENA_96_liver_female	336	REACTOME	REACTOME_glycosphingolipid_metabolism	6	172	38	9217	0.087	6.5e-05	HEXA;CTSA;ARSG;GAL3ST1;ARSE;ASAH1
MEGENA_96_liver_female	336	REACTOME	REACTOME_sphingolipid_metabolism	7	172	69	9217	0.38	0.00028	HEXA;CTSA;PPAP2C;ARSG;GAL3ST1;ARSE;ASAH1
MEGENA_96_liver_female	336	REACTOME	REACTOME_regulation_of_signaling_by_cbl	4	172	18	9217	0.39	0.00029	PIK3R1;BLNK;PIK3R2;CRKL
MEGENA_96_liver_female	336	REACTOME	REACTOME_downstream_signal_transduction	8	172	95	9217	0.51	0.00038	ADCY6;PDGFA;GRB7;PIK3R1;STAT3;PRKCE;PIK3R2;CRKL
MEGENA_31_liver_female	293	KEGG	KEGG_non_small_cell_lung_cancer	7	155	54	9217	0.04	3e-05	FHIT;CCND1;E2F1;CDK6;TP53;ARAF;TGFA
MEGENA_31_liver_female	293	BIOCARTA	BIOCARTA_g1_pathway	5	155	28	9217	0.12	9.1e-05	CCND1;ATR;E2F1;CDK6;TP53
MEGENA_31_liver_female	293	KEGG	KEGG_glioma	7	155	65	9217	0.14	0.0001	CCND1;E2F1;CDK6;CAMK2B;TP53;ARAF;TGFA
MEGENA_31_liver_female	293	REACTOME	REACTOME_signaling_by_notch	8	155	103	9217	0.44	0.00033	CCND1;DLL1;TLE3;HES1;E2F1;TP53;MAML1;MFNG
MEGENA_31_liver_female	293	REACTOME	REACTOME_pre_notch_expression_and_processing	5	155	44	9217	1	0.00081	CCND1;E2F1;TP53;MAML1;MFNG
MEGENA_97_liver_female	262	KEGG	KEGG_non_small_cell_lung_cancer	7	141	54	9217	0.022	1.6e-05	FHIT;CCND1;E2F1;CDK6;TP53;ARAF;TGFA
MEGENA_97_liver_female	262	BIOCARTA	BIOCARTA_g1_pathway	5	141	28	9217	0.077	5.8e-05	CCND1;ATR;E2F1;CDK6;TP53
MEGENA_97_liver_female	262	REACTOME	REACTOME_signaling_by_notch	8	141	103	9217	0.23	0.00017	CCND1;DLL1;TLE3;HES1;E2F1;TP53;MAML1;MFNG
MEGENA_97_liver_female	262	KEGG	KEGG_glioma	6	141	65	9217	0.6	0.00045	CCND1;E2F1;CDK6;TP53;ARAF;TGFA
MEGENA_97_liver_female	262	REACTOME	REACTOME_pre_notch_expression_and_processing	5	141	44	9217	0.7	0.00052	CCND1;E2F1;TP53;MAML1;MFNG
MEGENA_35_liver_female	246	PID	PID_igf1_pathway	4	130	30	9217	1	0.00078	IRS2;BCAR1;SOS1;IGF1
MEGENA_35_liver_female	246	REACTOME	REACTOME_asparagine_n_linked_glycosylation	6	130	81	9217	1	0.00096	GANAB;TUSC3;MAN2A1;DOLK;B4GALT1;B4GALT5
MEGENA_35_liver_female	246	REACTOME	REACTOME_post_translational_protein_modification	9	130	188	9217	1	0.0013	ARSA;GANAB;TUSC3;MAN2A1;PIGH;DOLK;PROZ;B4GALT1;B4GALT5
MEGENA_35_liver_female	246	PID	PID_rac1_reg_pathway	4	130	38	9217	1	0.0019	RAP1GDS1;SOS1;DOCK1;TIAM1
MEGENA_104_liver_female	228	PID	PID_igf1_pathway	4	124	30	9217	0.87	0.00065	IRS2;BCAR1;SOS1;IGF1
MEGENA_104_liver_female	228	PID	PID_rac1_reg_pathway	4	124	38	9217	1	0.0016	RAP1GDS1;SOS1;DOCK1;TIAM1
MEGENA_104_liver_female	228	PID	PID_ecadherin_nascentaj_pathway	4	124	39	9217	1	0.0018	CYFIP2;PIP5K1C;TIAM1;KLHL20
MEGENA_104_liver_female	228	REACTOME	REACTOME_glycosaminoglycan_metabolism	6	124	111	9217	1	0.0038	HS2ST1;CHPF2;SDC2;B4GALT1;B3GALT6;B4GALT5
MEGENA_16_liver_female	217	KEGG	KEGG_fatty_acid_metabolism	10	118	42	9217	1.1e-07	8.4e-11	CYP4A11;CPT2;ALDH3A2;ECI1;CPT1A;ACAA1;EHHADH;HADHA;ACSL1;ACAT1
MEGENA_16_liver_female	217	KEGG	KEGG_peroxisome	12	118	78	9217	3.1e-07	2.4e-10	ACOT8;PEX11A;DECR2;PEX19;MLYCD;ACAA1;EHHADH;PEX13;ACOX2;DHRS4;ACSL1;PEX14
MEGENA_16_liver_female	217	REACTOME	REACTOME_fatty_acid_triacylglycerol_and_ketone_body_metabolism	13	118	168	9217	0.00027	2e-07	DECR1;CYP4A11;SLC25A20;CPT2;ECI1;PEX11A;CPT1A;GK;TBL1XR1;HADHA;ACSL1;ACAT1;ANKRD1
MEGENA_16_liver_female	217	KEGG	KEGG_biosynthesis_of_unsaturated_fatty_acids	6	118	22	9217	0.00033	2.4e-07	ACOT1;ACOT2;ACOT4;PTPLA;ACAA1;HADHA
MEGENA_16_liver_female	217	REACTOME	REACTOME_metabolism_of_lipids_and_lipoproteins	20	118	478	9217	0.0032	2.4e-06	DECR1;MGLL;ACOT8;CYP4A11;SLC25A20;CPT2;ECI1;PEX11A;CPT1A;SMPD2;ACAA1;GK;TBL1XR1;ACOX2;LDLRAP1;HADHA;ACSL1;ACAT1;VAPB;ANKRD1
MEGENA_172_liver_female	216	REACTOME	REACTOME_downstream_signal_transduction	6	113	95	9217	1	0.0011	ADCY6;PDGFA;GRB7;PIK3R1;STAT3;CRKL
MEGENA_172_liver_female	216	PID	PID_ifngpathway	4	113	40	9217	1	0.0014	PIK3R1;STAT3;PIAS4;CRKL
MEGENA_172_liver_female	216	KEGG	KEGG_ppar_signaling_pathway	5	113	69	9217	1	0.0015	PPARG;CD36;SORBS1;FABP2;CYP8B1
MEGENA_172_liver_female	216	PID	PID_hes_heypathway	4	113	48	9217	1	0.0028	SPEN;GAA;GATA6;STAT3
MEGENA_220_liver_female	210	REACTOME	REACTOME_downstream_signal_transduction	6	110	95	9217	1	0.00093	ADCY6;PDGFA;GRB7;PIK3R1;STAT3;CRKL
MEGENA_220_liver_female	210	PID	PID_ifngpathway	4	110	40	9217	1	0.0013	PIK3R1;STAT3;PIAS4;CRKL
MEGENA_220_liver_female	210	KEGG	KEGG_ppar_signaling_pathway	5	110	69	9217	1	0.0014	PPARG;CD36;SORBS1;FABP2;CYP8B1
MEGENA_220_liver_female	210	PID	PID_hes_heypathway	4	110	48	9217	1	0.0025	SPEN;GAA;GATA6;STAT3
MEGENA_67_liver_female	195	KEGG	KEGG_fatty_acid_metabolism	10	108	42	9217	4.6e-08	3.4e-11	CYP4A11;CPT2;ALDH3A2;ECI1;CPT1A;ACAA1;EHHADH;HADHA;ACSL1;ACAT1
MEGENA_67_liver_female	195	KEGG	KEGG_peroxisome	12	108	78	9217	1.1e-07	8.2e-11	ACOT8;PEX11A;DECR2;PEX19;MLYCD;ACAA1;EHHADH;PEX13;ACOX2;DHRS4;ACSL1;PEX14
MEGENA_67_liver_female	195	REACTOME	REACTOME_fatty_acid_triacylglycerol_and_ketone_body_metabolism	13	108	168	9217	9.4e-05	7.1e-08	DECR1;CYP4A11;SLC25A20;CPT2;ECI1;PEX11A;CPT1A;GK;TBL1XR1;HADHA;ACSL1;ACAT1;ANKRD1
MEGENA_67_liver_female	195	KEGG	KEGG_biosynthesis_of_unsaturated_fatty_acids	6	108	22	9217	0.00019	1.4e-07	ACOT1;ACOT2;ACOT4;PTPLA;ACAA1;HADHA
MEGENA_67_liver_female	195	REACTOME	REACTOME_metabolism_of_lipids_and_lipoproteins	20	108	478	9217	0.00074	5.5e-07	DECR1;MGLL;ACOT8;CYP4A11;SLC25A20;CPT2;ECI1;PEX11A;CPT1A;SMPD2;ACAA1;GK;TBL1XR1;ACOX2;LDLRAP1;HADHA;ACSL1;ACAT1;VAPB;ANKRD1
MEGENA_149_liver_female	164	KEGG	KEGG_fatty_acid_metabolism	9	87	42	9217	1.8e-07	1.4e-10	CYP4A11;CPT2;ALDH3A2;ECI1;CPT1A;ACAA1;HADHA;ACSL1;ACAT1
MEGENA_149_liver_female	164	REACTOME	REACTOME_fatty_acid_triacylglycerol_and_ketone_body_metabolism	13	87	168	9217	6.5e-06	4.9e-09	DECR1;CYP4A11;SLC25A20;CPT2;ECI1;PEX11A;CPT1A;GK;TBL1XR1;HADHA;ACSL1;ACAT1;ANKRD1
MEGENA_149_liver_female	164	REACTOME	REACTOME_metabolism_of_lipids_and_lipoproteins	20	87	478	9217	1.6e-05	1.2e-08	DECR1;MGLL;ACOT8;CYP4A11;SLC25A20;CPT2;ECI1;PEX11A;CPT1A;SMPD2;ACAA1;GK;TBL1XR1;ACOX2;LDLRAP1;HADHA;ACSL1;ACAT1;VAPB;ANKRD1
MEGENA_149_liver_female	164	KEGG	KEGG_biosynthesis_of_unsaturated_fatty_acids	6	87	22	9217	5.2e-05	3.9e-08	ACOT1;ACOT2;ACOT4;PTPLA;ACAA1;HADHA
MEGENA_149_liver_female	164	KEGG	KEGG_peroxisome	9	87	78	9217	5.6e-05	4.2e-08	ACOT8;PEX11A;DECR2;PEX19;ACAA1;ACOX2;DHRS4;ACSL1;PEX14
MEGENA_34_liver_female	120	KEGG	KEGG_metabolism_of_xenobiotics_by_cytochrome_p450	5	71	70	9217	0.26	0.00019	GSTM3;GSTM2;GSTA1;CYP2B6;GSTM1
MEGENA_34_liver_female	120	KEGG	KEGG_drug_metabolism_cytochrome_p450	5	71	72	9217	0.29	0.00022	GSTM3;GSTM2;GSTA1;CYP2B6;GSTM1
MEGENA_34_liver_female	120	KEGG	KEGG_glutathione_metabolism	4	71	50	9217	0.76	0.00057	GSTM3;GSTM2;GSTA1;GSTM1
MEGENA_34_liver_female	120	PID	PID_p53downstreampathway	6	71	137	9217	0.83	0.00063	JUN;DDIT4;PLK3;BTG2;GDF15;DUSP1
MEGENA_171_liver_female	99	REACTOME	REACTOME_sphingolipid_metabolism	5	51	69	9217	0.049	3.6e-05	HEXA;CTSA;PPAP2C;GAL3ST1;ASAH1
MEGENA_171_liver_female	99	KEGG	KEGG_lysosome	6	51	121	9217	0.067	5e-05	HEXA;CTSA;CTSZ;CLN5;ASAH1;GNS
MEGENA_171_liver_female	99	REACTOME	REACTOME_glycosphingolipid_metabolism	4	51	38	9217	0.071	5.3e-05	HEXA;CTSA;GAL3ST1;ASAH1
MEGENA_171_liver_female	99	REACTOME	REACTOME_phospholipid_metabolism	6	51	198	9217	0.98	0.00073	HEXA;CTSA;PPAP2C;GAL3ST1;MTMR2;ASAH1
MEGENA_19_liver_female	79	PID	PID_erbb1_downstream_pathway	5	42	105	9217	0.14	0.00011	GAB1;DUSP6;PPP5C;HRAS;MLST8
MEGENA_19_liver_female	79	REACTOME	REACTOME_signaling_by_egfr_in_cancer	4	42	109	9217	1	0.0015	GAB1;AP2B1;HRAS;MLST8
MEGENA_212_liver_female	66	REACTOME	REACTOME_metabolism_of_lipids_and_lipoproteins	12	31	478	9217	2.5e-05	1.9e-08	MGLL;ACOT8;SLC25A20;PEX11A;CPT1A;SMPD2;GK;TBL1XR1;LDLRAP1;ACAT1;VAPB;ANKRD1
MEGENA_212_liver_female	66	REACTOME	REACTOME_fatty_acid_triacylglycerol_and_ketone_body_metabolism	7	31	168	9217	0.0014	1.1e-06	SLC25A20;PEX11A;CPT1A;GK;TBL1XR1;ACAT1;ANKRD1
MEGENA_212_liver_female	66	KEGG	KEGG_peroxisome	4	31	78	9217	0.17	0.00013	ACOT8;PEX11A;DECR2;PEX19
MEGENA_212_liver_female	66	REACTOME	REACTOME_ppara_activates_gene_expression	4	31	104	9217	0.51	0.00038	PEX11A;CPT1A;TBL1XR1;ANKRD1
MEGENA_100_liver_female	41	REACTOME	REACTOME_nfkb_and_map_kinases_activation_mediated_by_tlr4_signaling_repertoire	4	24	72	9217	0.043	3.2e-05	JUN;FOS;DUSP3;RIPK1
MEGENA_100_liver_female	41	REACTOME	REACTOME_trif_mediated_tlr3_signaling	4	24	74	9217	0.048	3.6e-05	JUN;FOS;DUSP3;RIPK1
MEGENA_100_liver_female	41	KEGG	KEGG_mapk_signaling_pathway	6	24	267	9217	0.064	4.8e-05	JUN;FOS;HSPA1B;DUSP3;DUSP1;NR4A1
MEGENA_100_liver_female	41	REACTOME	REACTOME_activated_tlr4_signalling	4	24	93	9217	0.12	8.8e-05	JUN;FOS;DUSP3;RIPK1
MEGENA_103_liver_female	41	KEGG	KEGG_glutathione_metabolism	4	10	50	9217	0.00021	1.6e-07	GSTM3;GSTM2;GSTA1;GSTM1
MEGENA_103_liver_female	41	KEGG	KEGG_metabolism_of_xenobiotics_by_cytochrome_p450	4	10	70	9217	0.00082	6.2e-07	GSTM3;GSTM2;GSTA1;GSTM1
MEGENA_103_liver_female	41	KEGG	KEGG_drug_metabolism_cytochrome_p450	4	10	72	9217	0.00092	6.9e-07	GSTM3;GSTM2;GSTA1;GSTM1
MEGENA_259_liver_female	41	KEGG	KEGG_fatty_acid_metabolism	5	25	42	9217	0.0001	7.6e-08	CYP4A11;ALDH3A2;ECI1;ACAA1;HADHA
MEGENA_264_liver_female	37	KEGG	KEGG_fatty_acid_metabolism	5	22	42	9217	5.1e-05	3.8e-08	CYP4A11;ALDH3A2;ECI1;ACAA1;HADHA
MEGENA_101_liver_female	21	REACTOME	REACTOME_metabolism_of_lipids_and_lipoproteins	5	10	478	9217	0.099	7.4e-05	HSD17B12;SCARB1;SIN3A;APOC2;PI4KA
MEGENA_159_liver_female	17	REACTOME	REACTOME_fatty_acid_triacylglycerol_and_ketone_body_metabolism	4	12	168	9217	0.063	4.7e-05	G0S2;GPD2;YAP1;PLIN2
MEGENA_159_liver_female	17	REACTOME	REACTOME_metabolism_of_lipids_and_lipoproteins	5	12	478	9217	0.29	0.00022	G0S2;CRAT;GPD2;YAP1;PLIN2
WGCNA_2_liver_female	1329	PID	PID_myc_pathway	8	694	25	9217	0.45	0.00034	MAX;CDKN2A;ZBTB17;RUVBL2;RUVBL1;AXIN1;TRRAP;SKP2
WGCNA_2_liver_female	1329	PID	PID_hes_heypathway	11	694	48	9217	0.93	0.0007	HES1;GATA6;SPEN;TLE1;GATA4;STAT3;RBPJ;KDM1A;MYB;MAML1;NCOA1
WGCNA_2_liver_female	1329	BIOCARTA	BIOCARTA_alk_pathway	9	694	37	9217	1	0.0014	MYL2;WNT1;CHRD;TGFBR3;NPPA;GATA4;AXIN1;BMPR1A;TGFBR1
WGCNA_2_liver_female	1329	REACTOME	REACTOME_yap1_and_wwtr1_taz_stimulated_gene_expression	7	694	24	9217	1	0.0015	CTGF;TEAD2;SMARCD3;NPPA;TEAD1;NCOA6;NCOA1
WGCNA_2_liver_female	1329	KEGG	KEGG_basal_cell_carcinoma	11	694	55	9217	1	0.0023	SMO;WNT5B;FZD4;WNT1;AXIN2;FZD6;FZD5;GLI1;WNT10A;AXIN1;FZD7
WGCNA_5_liver_female	668	REACTOME	REACTOME_homologous_recombination_repair_of_replication_independent_double_strand_breaks	5	358	17	9217	0.48	0.00036	MRE11A;RAD52;RAD50;H2AFX;RPA2
WGCNA_5_liver_female	668	BIOCARTA	BIOCARTA_ets_pathway	5	358	18	9217	0.65	0.00048	JUN;RBL2;E2F4;E2F1;SIN3A
WGCNA_5_liver_female	668	PID	PID_e2f_pathway	10	358	74	9217	0.72	0.00054	RRM2;RBL2;E2F4;TOPBP1;CDKN1B;CCND3;E2F1;TRIM28;MYBL2;RBBP4
WGCNA_5_liver_female	668	REACTOME	REACTOME_apoptosis_induced_dna_fragmentation	4	358	13	9217	1	0.0012	HIST1H1C;DFFA;DFFB;H1F0
WGCNA_5_liver_female	668	PID	PID_atm_pathway	6	358	34	9217	1	0.0018	BID;MRE11A;RAD50;H2AFX;TRIM28;UIMC1
WGCNA_11_liver_female	138	KEGG	KEGG_proteasome	4	68	48	9217	0.55	0.00041	PSME3;PSMC4;PSMB7;PSMD13
WGCNA_11_liver_female	138	REACTOME	REACTOME_hiv_infection	7	68	207	9217	1	0.00079	NUP93;ERCC3;KPNA1;TAF12;PSMC4;PSMB7;PSMD13
WGCNA_11_liver_female	138	REACTOME	REACTOME_signaling_by_wnt	4	68	65	9217	1	0.0013	PPP2R5B;PSMC4;PSMB7;PSMD13
WGCNA_11_liver_female	138	REACTOME	REACTOME_host_interactions_of_hiv_factors	5	68	132	9217	1	0.0028	NUP93;KPNA1;PSMC4;PSMB7;PSMD13
WGCNA_14_liver_female	103	KEGG	KEGG_fatty_acid_metabolism	10	62	42	9217	1.5e-10	1.1e-13	CYP4A11;CPT1A;ALDH3A2;EHHADH;ECI2;ECI1;CPT2;HADHA;ACSL1;ACAT1
WGCNA_14_liver_female	103	REACTOME	REACTOME_fatty_acid_triacylglycerol_and_ketone_body_metabolism	14	62	168	9217	4.7e-09	3.5e-12	G0S2;CYP4A11;PEX11A;GK;CPT1A;TBL1XR1;SLC25A20;BDH1;DECR1;ECI1;CPT2;HADHA;ACSL1;ACAT1
WGCNA_14_liver_female	103	KEGG	KEGG_peroxisome	10	62	78	9217	1e-07	7.8e-11	CRAT;PEX11A;DECR2;PEX19;ACOT8;EHHADH;ECI2;PEX14;ACSL1;DHRS4
WGCNA_14_liver_female	103	REACTOME	REACTOME_metabolism_of_lipids_and_lipoproteins	18	62	478	9217	1.6e-06	1.2e-09	G0S2;CRAT;CYP4A11;PEX11A;ACOT8;GK;CPT1A;TBL1XR1;MGLL;SLC25A20;BDH1;DECR1;LPGAT1;ECI1;CPT2;HADHA;ACSL1;ACAT1
WGCNA_14_liver_female	103	KEGG	KEGG_butanoate_metabolism	5	62	34	9217	0.0037	2.8e-06	ALDH3A2;EHHADH;BDH1;HADHA;ACAT1
WGCNA_17_liver_female	61	NABA	NABA_matrisome_associated	11	40	753	9217	0.34	0.00026	MMP12;MMP13;S100A11;TIMP1;ANXA2;SFTPD;TGM2;HHIP;CTSD;CSTB;ANXA4
WGCNA_17_liver_female	61	NABA	NABA_ecm_regulators	6	40	238	9217	0.68	0.00051	MMP12;MMP13;TIMP1;TGM2;CTSD;CSTB
WGCNA_18_liver_female	55	KEGG	KEGG_lysosome	4	35	121	9217	1	0.0011	HEXA;CTSA;CTSZ;CLTA
